# Supplementary material for: Structural and functional properties of spinal dorsal horn neurons after peripheral nerve injury change overtime via astrocyte activation
Source: PubMed Central journal article supplement — iScience. 2022 Nov 11;25(12):105555. doi: 10.1016/j.isci.2022.105555 (PMC9700017; doi:10.1016/j.isci.2022.105555), 2022-11-11
Supplement: mmc1.pdf [file mmc1.pdf]

iScience, Volume 25

## **Supplemental information**

### **Structural and functional properties of spinal dorsal horn neurons after peripheral nerve injury change overtime via astrocyte activation**

**Miyuki Kurabe, Mika Sasaki, Kenta Furutani, Hidemasa Furue, Yoshinori  
Kamiya, and Hiroshi Baba**

## **Supplemental information**

### **Structural and functional Properties of Spinal Dorsal Horn Neurons after Peripheral Nerve Injury Change over Time via Astrocyte Activation**

Miyuki Kurabe<sup>1</sup>, Mika Sasaki, Kenta Furutani, Hidemasa Furue, Yoshinori Kamiya, and Hiroshi Baba

# Figure S1

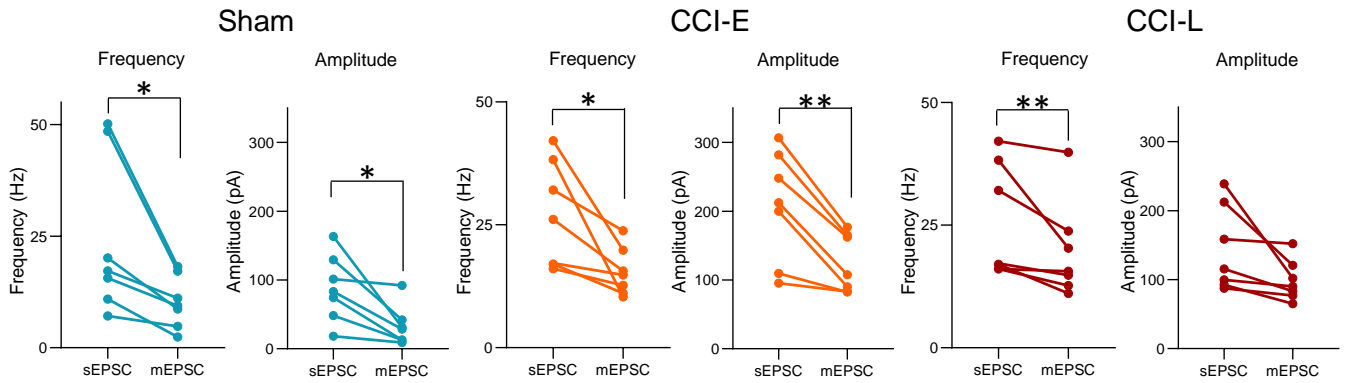

## Figure S1. miniature EPSCs. Related Figure 3.

Changes in EPSCs before and after perfusion of TTX (0.5  $\mu$ M) to the spinal surface.

Sham ( $n = 7$  cells from 4 rats); Frequency: before  $24.23 \pm 6.68$  Hz, after  $10.25 \pm 2.22$  Hz, \* $P = 0.0244$ , Amplitude: before  $88.26 \pm 18.40$  pA, after  $32.68 \pm 10.87$  pA, \* $P = 0.0155$ .

b, CCI-E ( $n = 7$  cells from 4 rats); Frequency: before  $44.23 \pm 5.05$  Hz, after  $24.56 \pm 2.56$  Hz, \*\* $P = 0.0022$ , Amplitude: before  $207.7 \pm 30.55$  pA, after  $124.0 \pm 15.98$  pA, \*\*\* $P < 0.0029$ .

c, CCI-L ( $n = 6$  cells from 4 rats); Frequency: before  $26.98 \pm 4.07$  Hz, after  $15.45 \pm 1.84$  Hz, \* $P = 0.0208$ , Amplitude: before  $143.7 \pm 23.15$  pA, after  $98.60 \pm 11.21$  pA,  $P = 0.0543$

Significant differences were assessed by paired t-test. Data are presented as means  $\pm$  s.e.m.

# Figure S2

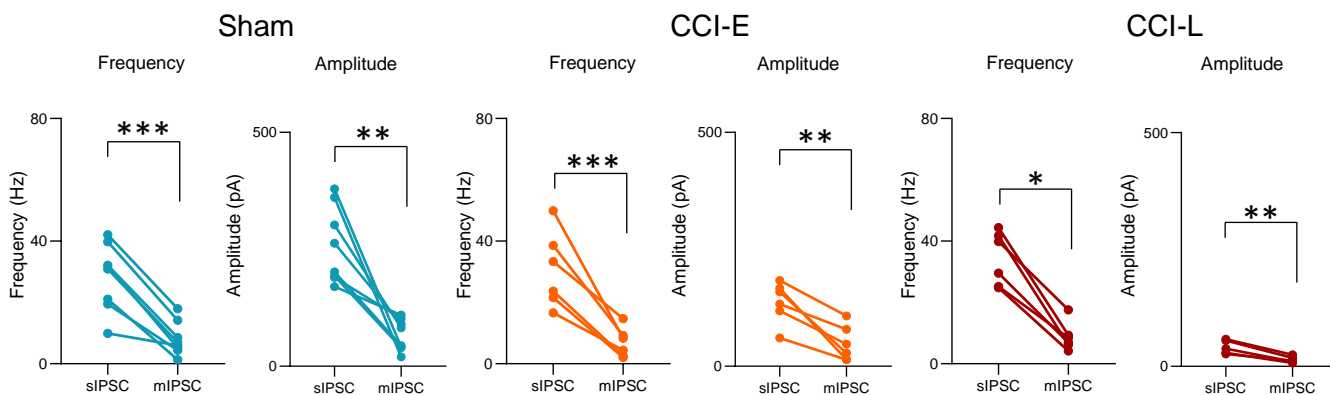

## Figure S2. miniature IPSCs. Related Figure 4.

Changes in IPSCs before and after perfusion of TTX (0.5  $\mu$ M) to the spinal surface.

a, Sham ( $n = 8$  cells from 5 rats); Frequency: before  $28.43 \pm 3.85$  Hz, after  $8.07 \pm 1.93$  Hz, \*\*\*P=0.0001, Amplitude: before  $257.5 \pm 28.95$  pA, after  $66.17 \pm 11.90$  pA, \*\*P = 0.0012.

b, CCI-E ( $n = 7$  cells from 4 rats); Frequency: before  $44.23 \pm 5.05$  Hz, after  $24.56 \pm 2.56$  Hz, \*\*P = 0.0022, Amplitude: before  $136.8 \pm 18.01$  pA, after  $48.20 \pm 15.47$  pA, \*\*P = 0.0039

c, CCI-L ( $n = 6$  cells from 4 rats); Frequency: before  $26.98 \pm 4.07$  Hz, after  $15.45 \pm 1.84$  Hz, \*P = 0.0208, Amplitude: before  $41.32 \pm 6.53$  pA, after  $14.54 \pm 3.10$  pA, \*\*P = 0.0028.

Significant differences were assessed by paired t-test. Data are presented as means  $\pm$  s.e.m.

# Figure S3

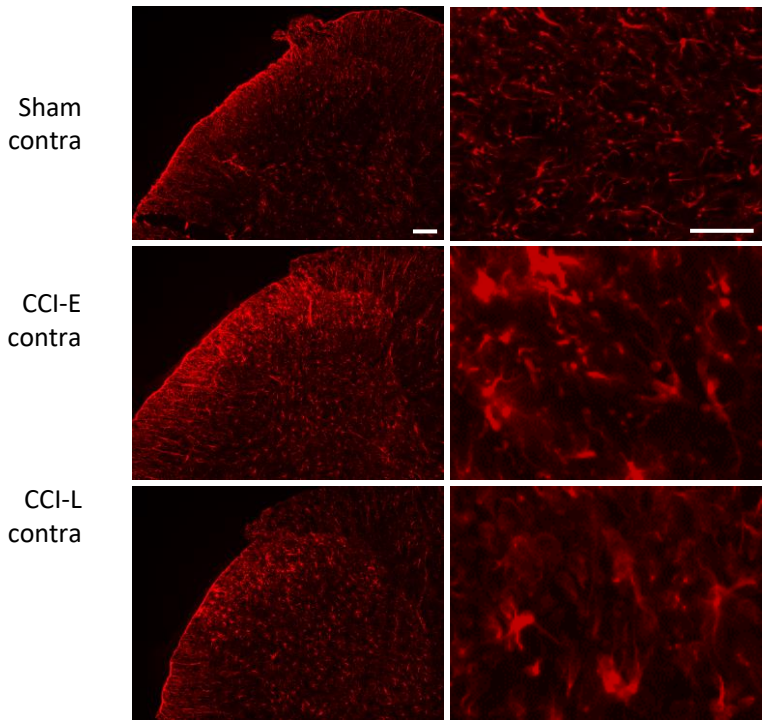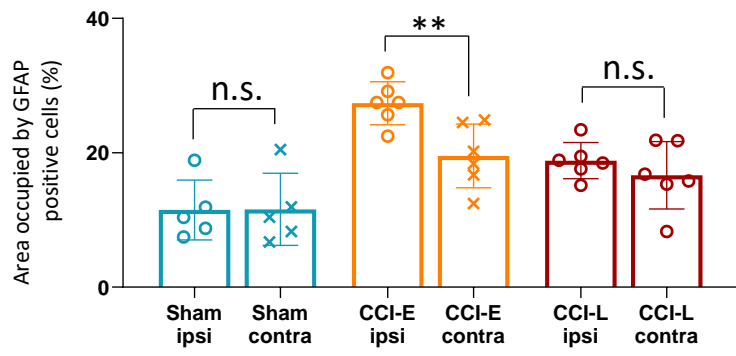

**Figure S3. Comparison of ipsilateral and contralateral astrocyte upregulation in SDH after CCI. Related Figure 5.**

(A) Low and high magnification images of GFAP-positive cells in contralateral SDH of Sham, CCI-E, and CCI-L rats. Scale bars are 100  $\mu$ m (left panels) and 50  $\mu$ m (right panels). (B) GFAP quantification. The percentage area occupied by GFAP positive cells in the SDH was analysed. Histograms indicate the relative mean area occupied by GFAP-positive cells on the ipsilateral and contralateral sides of the SDH in Sham, CCI-E, and CCI-L rats. (Sham-ipsi:  $11.48 \pm 1.99$  %, Sham-contra:  $11.57 \pm 2.40$  %,  $P = 0.978$ ; CCI-E-ipsi:  $27.37 \pm 1.30$  %, CCI-E-contra:  $11.57 \pm 2.05$  %,  $**P = 0.0073$ ; CCI-L-ipsi:  $18.83 \pm 1.10$  %, CCI-L-contra:  $16.65 \pm 2.40$  %,  $P = 0.3716$ ;  $n = 5$  rats in Sham group, and  $n = 6$  rats in CCI-E and CCI-L group respectively). Significant differences were assessed by two-sided unpaired Student's test. Data are presented as means  $\pm$  s.e.m. n.s., not significant.
